# Supplementary material
Source: PubMed Central journal article supplement (PMC6031129)
Supplement: NIHMS970547-supplement-2.pdf [file NIHMS970547-supplement-2.pdf]

## TRs and FAs of 3D-MRF

| Number | TR (ms) | FA (degree) |
|--------|---------|-------------|
| 1      | 12.7700 | 9           |
| 2      | 12.7200 | 10          |
| 3      | 12.6800 | 11          |
| 4      | 12.6300 | 12          |
| 5      | 12.6000 | 13          |
| 6      | 12.5600 | 13          |
| 7      | 12.5300 | 14          |
| 8      | 12.5000 | 15          |
| 9      | 12.4800 | 16          |
| 10     | 12.4600 | 17          |
| 11     | 12.4400 | 18          |
| 12     | 12.4200 | 19          |
| 13     | 12.4100 | 20          |
| 14     | 12.4000 | 21          |
| 15     | 12.3900 | 21          |
| 16     | 12.3800 | 22          |
| 17     | 12.3800 | 23          |
| 18     | 12.3700 | 24          |
| 19     | 12.3700 | 25          |
| 20     | 12.3700 | 25          |
| 21     | 12.3700 | 26          |
| 22     | 12.3700 | 27          |
| 23     | 12.3800 | 28          |
| 24     | 12.3800 | 29          |
| 25     | 12.3800 | 29          |
| 26     | 12.3900 | 30          |
| 27     | 12.3900 | 31          |
| 28     | 12.4000 | 31          |
| 29     | 12.4100 | 32          |
| 30     | 12.4100 | 33          |
| 31     | 12.4200 | 33          |
| 32     | 12.4400 | 34          |
| 33     | 12.4500 | 35          |
| 34     | 12.4700 | 35          |
| 35     | 12.4900 | 36          |
| 36     | 12.5100 | 36          |
| 37     | 12.5300 | 37          |
| 38     | 12.5600 | 37          |
| 39     | 12.5900 | 38          |
| 40     | 12.6100 | 38          |

|    |         |    |
|----|---------|----|
| 41 | 12.6400 | 39 |
| 42 | 12.6700 | 39 |
| 43 | 12.6900 | 40 |
| 44 | 12.7200 | 40 |
| 45 | 12.7400 | 40 |
| 46 | 12.7600 | 41 |
| 47 | 12.7800 | 41 |
| 48 | 12.7900 | 41 |
| 49 | 12.8000 | 42 |
| 50 | 12.8000 | 42 |
| 51 | 12.8100 | 42 |
| 52 | 12.8000 | 42 |
| 53 | 12.8000 | 42 |
| 54 | 12.7900 | 43 |
| 55 | 12.7800 | 43 |
| 56 | 12.7600 | 43 |
| 57 | 12.7400 | 43 |
| 58 | 12.7200 | 43 |
| 59 | 12.7000 | 43 |
| 60 | 12.6700 | 43 |
| 61 | 12.6500 | 43 |
| 62 | 12.6200 | 43 |
| 63 | 12.5900 | 43 |
| 64 | 12.5500 | 43 |
| 65 | 12.5200 | 43 |
| 66 | 12.4900 | 43 |
| 67 | 12.4600 | 42 |
| 68 | 12.4300 | 42 |
| 69 | 12.4000 | 42 |
| 70 | 12.3800 | 42 |
| 71 | 12.3500 | 42 |
| 72 | 12.3400 | 41 |
| 73 | 12.3200 | 41 |
| 74 | 12.3100 | 41 |
| 75 | 12.3100 | 40 |
| 76 | 12.3100 | 40 |
| 77 | 12.3200 | 40 |
| 78 | 12.3300 | 39 |
| 79 | 12.3500 | 39 |
| 80 | 12.3600 | 38 |
| 81 | 12.3800 | 38 |
| 82 | 12.4000 | 37 |
| 83 | 12.4200 | 37 |

|     |         |    |
|-----|---------|----|
| 84  | 12.4300 | 36 |
| 85  | 12.4400 | 36 |
| 86  | 12.4500 | 35 |
| 87  | 12.4500 | 35 |
| 88  | 12.4500 | 34 |
| 89  | 12.4400 | 33 |
| 90  | 12.4200 | 33 |
| 91  | 12.4000 | 32 |
| 92  | 12.3700 | 31 |
| 93  | 12.3400 | 31 |
| 94  | 12.3000 | 30 |
| 95  | 12.2600 | 29 |
| 96  | 12.2200 | 29 |
| 97  | 12.1900 | 28 |
| 98  | 12.1500 | 27 |
| 99  | 12.1100 | 26 |
| 100 | 12.0800 | 25 |
| 101 | 12.0500 | 25 |
| 102 | 12.0300 | 24 |
| 103 | 12.0100 | 23 |
| 104 | 12.0000 | 22 |
| 105 | 12.0000 | 21 |
| 106 | 12.0000 | 21 |
| 107 | 12.0200 | 20 |
| 108 | 12.0400 | 19 |
| 109 | 12.0600 | 18 |
| 110 | 12.1000 | 17 |
| 111 | 12.1300 | 16 |
| 112 | 12.1800 | 15 |
| 113 | 12.2200 | 14 |
| 114 | 12.2700 | 13 |
| 115 | 12.3200 | 13 |
| 116 | 12.3700 | 12 |
| 117 | 12.4100 | 11 |
| 118 | 12.4600 | 10 |
| 119 | 12.5000 | 9  |
| 120 | 12.5400 | 8  |
| 121 | 12.5700 | 4  |
| 122 | 12.5900 | 4  |
| 123 | 12.6100 | 5  |
| 124 | 12.6200 | 6  |
| 125 | 12.6300 | 6  |
| 126 | 12.6300 | 7  |

|     |         |    |
|-----|---------|----|
| 127 | 12.6300 | 8  |
| 128 | 12.6200 | 8  |
| 129 | 12.6100 | 9  |
| 130 | 12.6000 | 9  |
| 131 | 12.5900 | 10 |
| 132 | 12.5700 | 11 |
| 133 | 12.5600 | 11 |
| 134 | 12.5400 | 12 |
| 135 | 12.5200 | 13 |
| 136 | 12.5000 | 13 |
| 137 | 12.4900 | 14 |
| 138 | 12.4700 | 14 |
| 139 | 12.4600 | 15 |
| 140 | 12.4500 | 15 |
| 141 | 12.4400 | 16 |
| 142 | 12.4300 | 17 |
| 143 | 12.4200 | 17 |
| 144 | 12.4100 | 18 |
| 145 | 12.4100 | 18 |
| 146 | 12.4100 | 19 |
| 147 | 12.4100 | 19 |
| 148 | 12.4100 | 20 |
| 149 | 12.4100 | 20 |
| 150 | 12.4100 | 21 |
| 151 | 12.4100 | 21 |
| 152 | 12.4000 | 22 |
| 153 | 12.4000 | 22 |
| 154 | 12.3900 | 22 |
| 155 | 12.3800 | 23 |
| 156 | 12.3600 | 23 |
| 157 | 12.3400 | 24 |
| 158 | 12.3200 | 24 |
| 159 | 12.2900 | 24 |
| 160 | 12.2600 | 25 |
| 161 | 12.2400 | 25 |
| 162 | 12.2100 | 25 |
| 163 | 12.1900 | 26 |
| 164 | 12.1600 | 26 |
| 165 | 12.1500 | 26 |
| 166 | 12.1400 | 26 |
| 167 | 12.1400 | 27 |
| 168 | 12.1400 | 27 |
| 169 | 12.1500 | 27 |

|     |         |    |
|-----|---------|----|
| 170 | 12.1800 | 27 |
| 171 | 12.2100 | 27 |
| 172 | 12.2400 | 27 |
| 173 | 12.2900 | 28 |
| 174 | 12.3300 | 28 |
| 175 | 12.3700 | 28 |
| 176 | 12.4100 | 28 |
| 177 | 12.4500 | 28 |
| 178 | 12.4800 | 28 |
| 179 | 12.5100 | 28 |
| 180 | 12.5300 | 28 |
| 181 | 12.5400 | 28 |
| 182 | 12.5300 | 28 |
| 183 | 12.5200 | 28 |
| 184 | 12.4900 | 28 |
| 185 | 12.4600 | 28 |
| 186 | 12.4300 | 28 |
| 187 | 12.3900 | 28 |
| 188 | 12.3500 | 27 |
| 189 | 12.3200 | 27 |
| 190 | 12.2900 | 27 |
| 191 | 12.2600 | 27 |
| 192 | 12.2500 | 27 |
| 193 | 12.2400 | 27 |
| 194 | 12.2400 | 26 |
| 195 | 12.2600 | 26 |
| 196 | 12.2800 | 26 |
| 197 | 12.3200 | 26 |
| 198 | 12.3500 | 25 |
| 199 | 12.4000 | 25 |
| 200 | 12.4400 | 25 |
| 201 | 12.4900 | 24 |
| 202 | 12.5300 | 24 |
| 203 | 12.5700 | 24 |
| 204 | 12.6000 | 23 |
| 205 | 12.6300 | 23 |
| 206 | 12.6400 | 22 |
| 207 | 12.6500 | 22 |
| 208 | 12.6500 | 22 |
| 209 | 12.6500 | 21 |
| 210 | 12.6300 | 21 |
| 211 | 12.6200 | 20 |
| 212 | 12.5900 | 20 |

|     |         |    |
|-----|---------|----|
| 213 | 12.5700 | 19 |
| 214 | 12.5400 | 19 |
| 215 | 12.5100 | 18 |
| 216 | 12.4800 | 18 |
| 217 | 12.4600 | 17 |
| 218 | 12.4300 | 17 |
| 219 | 12.4100 | 16 |
| 220 | 12.3900 | 15 |
| 221 | 12.3800 | 15 |
| 222 | 12.3600 | 14 |
| 223 | 12.3600 | 14 |
| 224 | 12.3500 | 13 |
| 225 | 12.3500 | 13 |
| 226 | 12.3500 | 12 |
| 227 | 12.3600 | 11 |
| 228 | 12.3700 | 11 |
| 229 | 12.3900 | 10 |
| 230 | 12.4100 | 9  |
| 231 | 12.4300 | 9  |
| 232 | 12.4500 | 8  |
| 233 | 12.4800 | 8  |
| 234 | 12.5000 | 7  |
| 235 | 12.5300 | 6  |
| 236 | 12.5500 | 6  |
| 237 | 12.5700 | 5  |
| 238 | 12.5900 | 4  |
| 239 | 12.6000 | 4  |
| 240 | 12.6100 | 3  |
| 241 | 12.6100 | 5  |
| 242 | 12.6000 | 7  |
| 243 | 12.5900 | 9  |
| 244 | 12.5800 | 11 |
| 245 | 12.5600 | 13 |
| 246 | 12.5400 | 15 |
| 247 | 12.5100 | 17 |
| 248 | 12.4900 | 19 |
| 249 | 12.4700 | 21 |
| 250 | 12.4400 | 22 |
| 251 | 12.4200 | 24 |
| 252 | 12.4100 | 26 |
| 253 | 12.3900 | 28 |
| 254 | 12.3900 | 30 |
| 255 | 12.3800 | 32 |

|     |         |    |
|-----|---------|----|
| 256 | 12.3800 | 34 |
| 257 | 12.3900 | 35 |
| 258 | 12.3900 | 37 |
| 259 | 12.4000 | 39 |
| 260 | 12.4100 | 40 |
| 261 | 12.4100 | 42 |
| 262 | 12.4200 | 44 |
| 263 | 12.4300 | 45 |
| 264 | 12.4300 | 47 |
| 265 | 12.4300 | 49 |
| 266 | 12.4300 | 50 |
| 267 | 12.4200 | 52 |
| 268 | 12.4200 | 53 |
| 269 | 12.4100 | 55 |
| 270 | 12.4000 | 56 |
| 271 | 12.3900 | 57 |
| 272 | 12.3700 | 59 |
| 273 | 12.3600 | 60 |
| 274 | 12.3500 | 61 |
| 275 | 12.3400 | 63 |
| 276 | 12.3300 | 64 |
| 277 | 12.3200 | 65 |
| 278 | 12.3100 | 66 |
| 279 | 12.2900 | 67 |
| 280 | 12.2800 | 68 |
| 281 | 12.2700 | 69 |
| 282 | 12.2600 | 70 |
| 283 | 12.2500 | 71 |
| 284 | 12.2400 | 72 |
| 285 | 12.2300 | 72 |
| 286 | 12.2200 | 73 |
| 287 | 12.2100 | 74 |
| 288 | 12.2000 | 74 |
| 289 | 12.1900 | 75 |
| 290 | 12.1900 | 75 |
| 291 | 12.1800 | 76 |
| 292 | 12.1800 | 76 |
| 293 | 12.1800 | 77 |
| 294 | 12.1800 | 77 |
| 295 | 12.1800 | 77 |
| 296 | 12.1800 | 78 |
| 297 | 12.1800 | 78 |
| 298 | 12.1800 | 78 |

|     |         |    |
|-----|---------|----|
| 299 | 12.1800 | 78 |
| 300 | 12.1800 | 78 |
| 301 | 12.1700 | 78 |
| 302 | 12.1700 | 78 |
| 303 | 12.1600 | 78 |
| 304 | 12.1600 | 78 |
| 305 | 12.1600 | 77 |
| 306 | 12.1500 | 77 |
| 307 | 12.1500 | 77 |
| 308 | 12.1500 | 76 |
| 309 | 12.1500 | 76 |
| 310 | 12.1600 | 75 |
| 311 | 12.1600 | 75 |
| 312 | 12.1800 | 74 |
| 313 | 12.1900 | 74 |
| 314 | 12.2100 | 73 |
| 315 | 12.2400 | 72 |
| 316 | 12.2600 | 72 |
| 317 | 12.2900 | 71 |
| 318 | 12.3200 | 70 |
| 319 | 12.3400 | 69 |
| 320 | 12.3700 | 68 |
| 321 | 12.3900 | 67 |
| 322 | 12.4200 | 66 |
| 323 | 12.4400 | 65 |
| 324 | 12.4500 | 64 |
| 325 | 12.4700 | 63 |
| 326 | 12.4700 | 61 |
| 327 | 12.4800 | 60 |
| 328 | 12.4800 | 59 |
| 329 | 12.4800 | 57 |
| 330 | 12.4800 | 56 |
| 331 | 12.4700 | 55 |
| 332 | 12.4600 | 53 |
| 333 | 12.4500 | 52 |
| 334 | 12.4400 | 50 |
| 335 | 12.4300 | 49 |
| 336 | 12.4200 | 47 |
| 337 | 12.4000 | 45 |
| 338 | 12.3900 | 44 |
| 339 | 12.3700 | 42 |
| 340 | 12.3500 | 40 |
| 341 | 12.3400 | 39 |



|     |         |    |
|-----|---------|----|
| 342 | 12.3200 | 37 |
| 343 | 12.3100 | 35 |
| 344 | 12.3000 | 34 |
| 345 | 12.2900 | 32 |
| 346 | 12.2900 | 30 |
| 347 | 12.2800 | 28 |
| 348 | 12.2900 | 26 |
| 349 | 12.2900 | 24 |
| 350 | 12.3000 | 22 |
| 351 | 12.3200 | 21 |
| 352 | 12.3300 | 19 |
| 353 | 12.3500 | 17 |
| 354 | 12.3700 | 15 |
| 355 | 12.3900 | 13 |
| 356 | 12.4100 | 11 |
| 357 | 12.4300 | 9  |
| 358 | 12.4500 | 7  |
| 359 | 12.4700 | 5  |
| 360 | 12.4800 | 3  |
| 361 | 12.4900 | 3  |
| 362 | 12.5000 | 4  |
| 363 | 12.5000 | 4  |
| 364 | 12.5000 | 4  |
| 365 | 12.5000 | 4  |
| 366 | 12.5000 | 5  |
| 367 | 12.4900 | 5  |
| 368 | 12.4900 | 5  |
| 369 | 12.4800 | 5  |
| 370 | 12.4800 | 6  |
| 371 | 12.4800 | 6  |
| 372 | 12.4800 | 6  |
| 373 | 12.4800 | 6  |
| 374 | 12.4800 | 7  |
| 375 | 12.4900 | 7  |
| 376 | 12.4900 | 7  |
| 377 | 12.5000 | 7  |
| 378 | 12.5100 | 8  |
| 379 | 12.5100 | 8  |
| 380 | 12.5200 | 8  |
| 381 | 12.5300 | 8  |
| 382 | 12.5300 | 8  |
| 383 | 12.5300 | 9  |
| 384 | 12.5300 | 9  |

|     |         |    |
|-----|---------|----|
| 385 | 12.5300 | 9  |
| 386 | 12.5200 | 9  |
| 387 | 12.5000 | 9  |
| 388 | 12.4900 | 10 |
| 389 | 12.4700 | 10 |
| 390 | 12.4500 | 10 |
| 391 | 12.4300 | 10 |
| 392 | 12.4100 | 10 |
| 393 | 12.3900 | 11 |
| 394 | 12.3700 | 11 |
| 395 | 12.3500 | 11 |
| 396 | 12.3300 | 11 |
| 397 | 12.3100 | 11 |
| 398 | 12.2900 | 11 |
| 399 | 12.2800 | 12 |
| 400 | 12.2700 | 12 |
| 401 | 12.2600 | 12 |
| 402 | 12.2500 | 12 |
| 403 | 12.2500 | 12 |
| 404 | 12.2500 | 12 |
| 405 | 12.2500 | 12 |
| 406 | 12.2600 | 12 |
| 407 | 12.2700 | 12 |
| 408 | 12.2800 | 13 |
| 409 | 12.3000 | 13 |
| 410 | 12.3200 | 13 |
| 411 | 12.3500 | 13 |
| 412 | 12.3700 | 13 |
| 413 | 12.4000 | 13 |
| 414 | 12.4300 | 13 |
| 415 | 12.4600 | 13 |
| 416 | 12.4800 | 13 |
| 417 | 12.5100 | 13 |
| 418 | 12.5300 | 13 |
| 419 | 12.5500 | 13 |
| 420 | 12.5700 | 13 |
